# Supplementary material for: Porous CeO2 nanospheres for a room temperature triethylamine sensor under high humidity conditions
Source: Royal Society of Chemistry journal article supplement (doi:10.1039/c8nj03300e), 2018-01-01
Supplement: c8nj03300e1.pdf [file c8nj03300e1.pdf]

## Supporting Information

### **Porous CeO<sub>2</sub> nanospheres for room temperature triethylamine sensor under high humidity condition**

Cecilia A. Zito, Tarcísio M. Perfecto, Diogo P. Volanti\*

*Laboratory of Materials for Sustainability (LabMatSus), Ibilce, São Paulo State  
University (Unesp),*

*R. Cristóvão Colombo, 2265, S. J. Rio Preto, SP, Brazil 15054-000*

\*E-mail: [diogo.volanti@unesp.br](mailto:diogo.volanti@unesp.br)

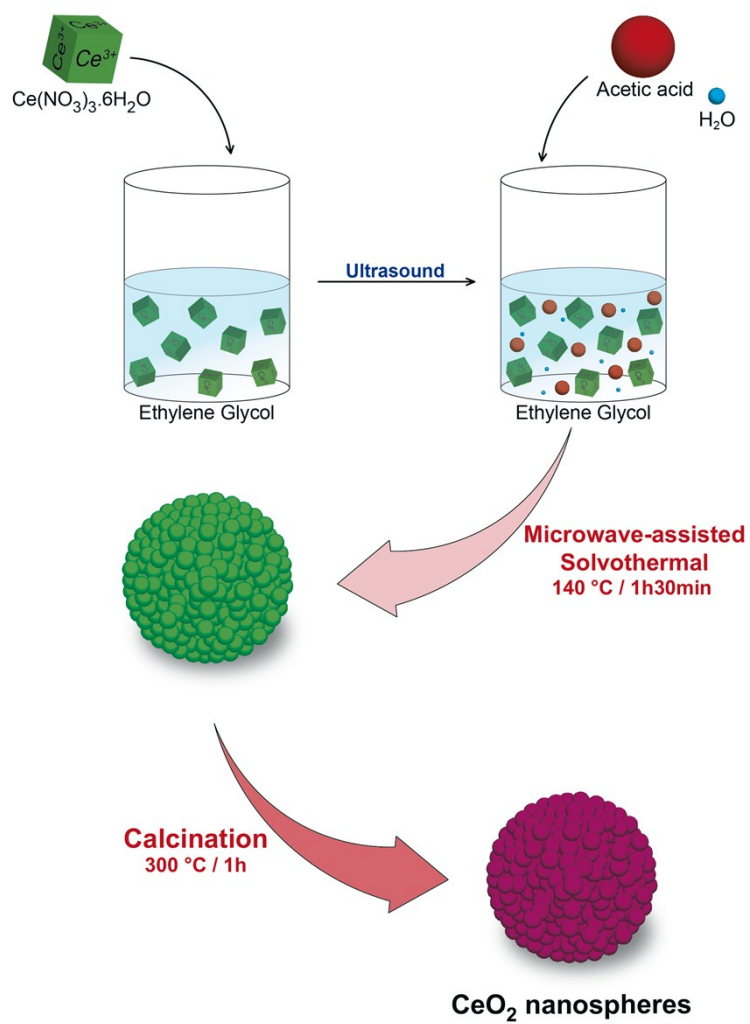

**Fig. S1** Schematic illustration of the synthesis of CeO<sub>2</sub> nanospheres (NS).

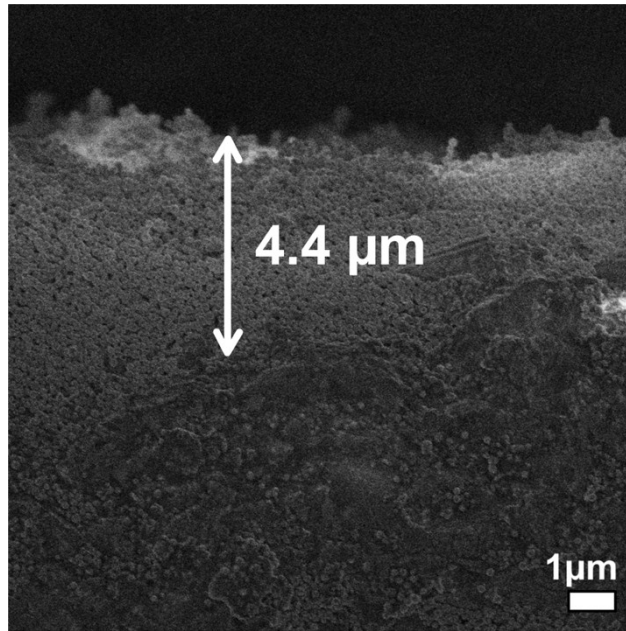

**Fig. S2** FESEM image of the cross section of the Au interdigitated alumina substrate after coating with CeO<sub>2</sub> NS. The thickness of the film can be estimated as 4.4 μm.

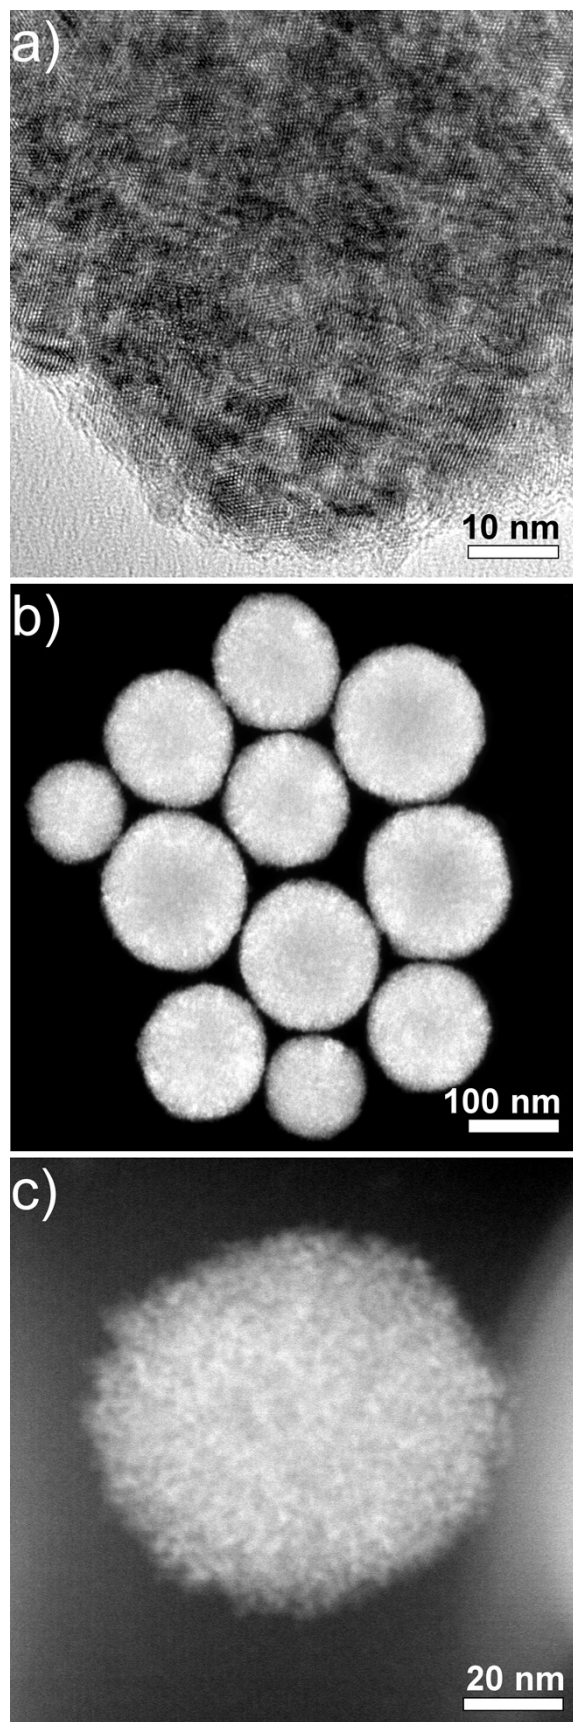

**Fig. S3** (a) HRTEM and (b,c) dark-field TEM images of CeO<sub>2</sub> NS.

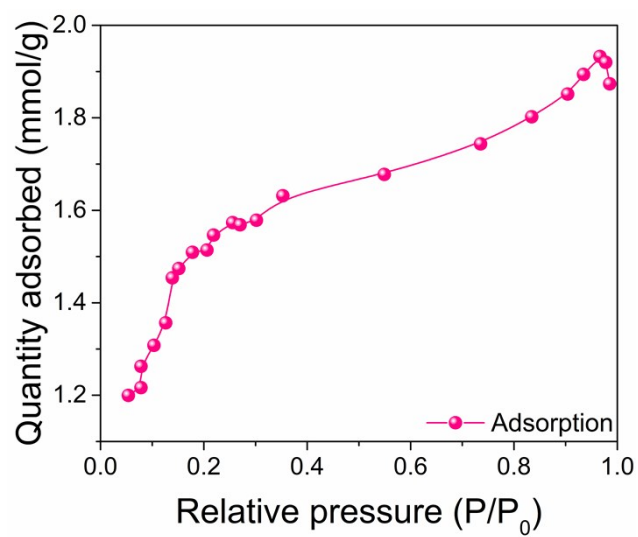

**Fig. S4** N<sub>2</sub> adsorption isotherm curve for CeO<sub>2</sub> NS.

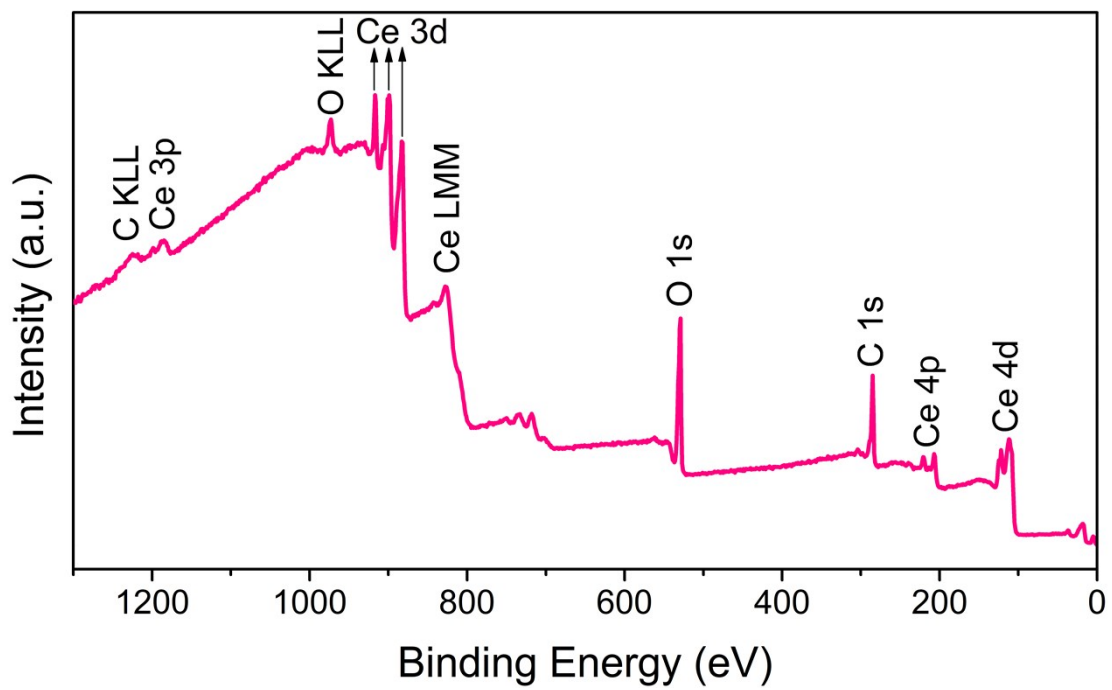

**Fig. S5** Survey XPS spectrum of CeO<sub>2</sub> NS.

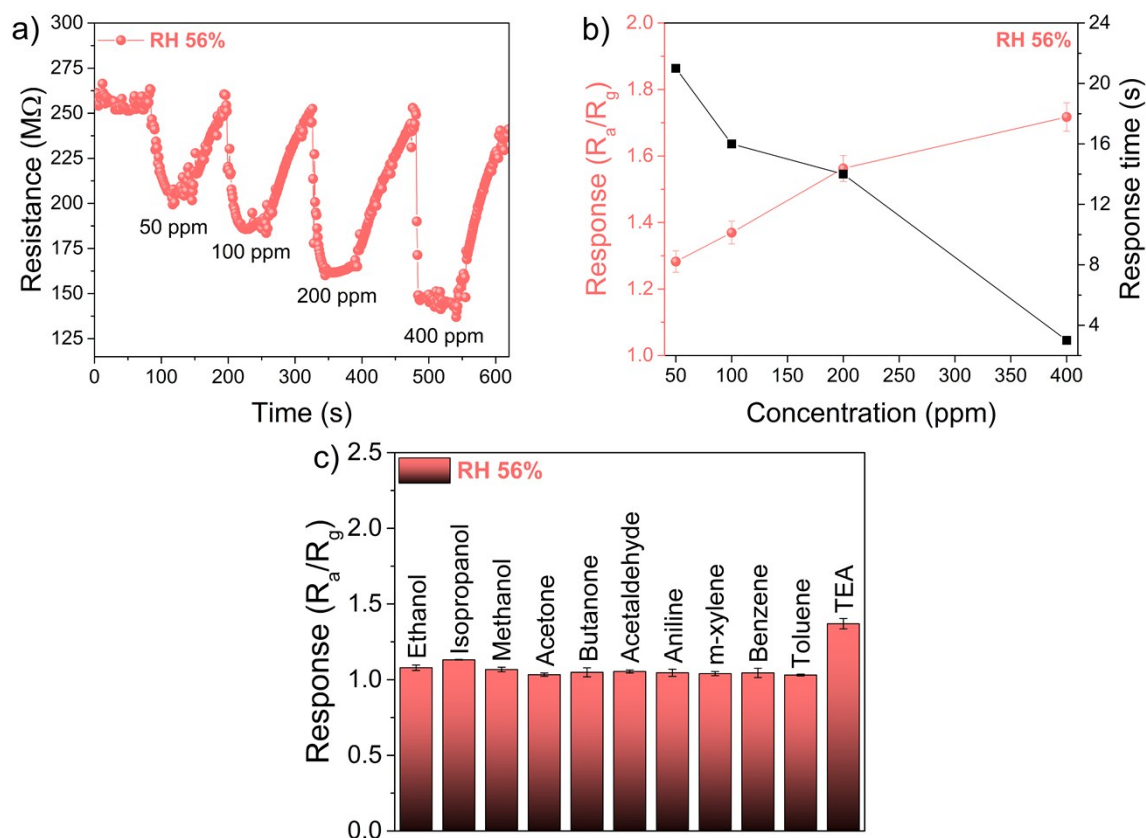

**Fig. S6** VOC-sensing performance of CeO<sub>2</sub> NS at room temperature and 56% RH. (a) Transient response curves to the concentration range of 50–400 ppm of TEA. The sensor is not sensitive to TEA concentrations lower than 50 ppm at 56% RH. (b) Sensing response and response time as a function of the TEA concentration. (c) VOCs-sensing selectivity of CeO<sub>2</sub> NS to different VOCs at the concentration of 100 ppm. The error bars show the standard deviation from average.

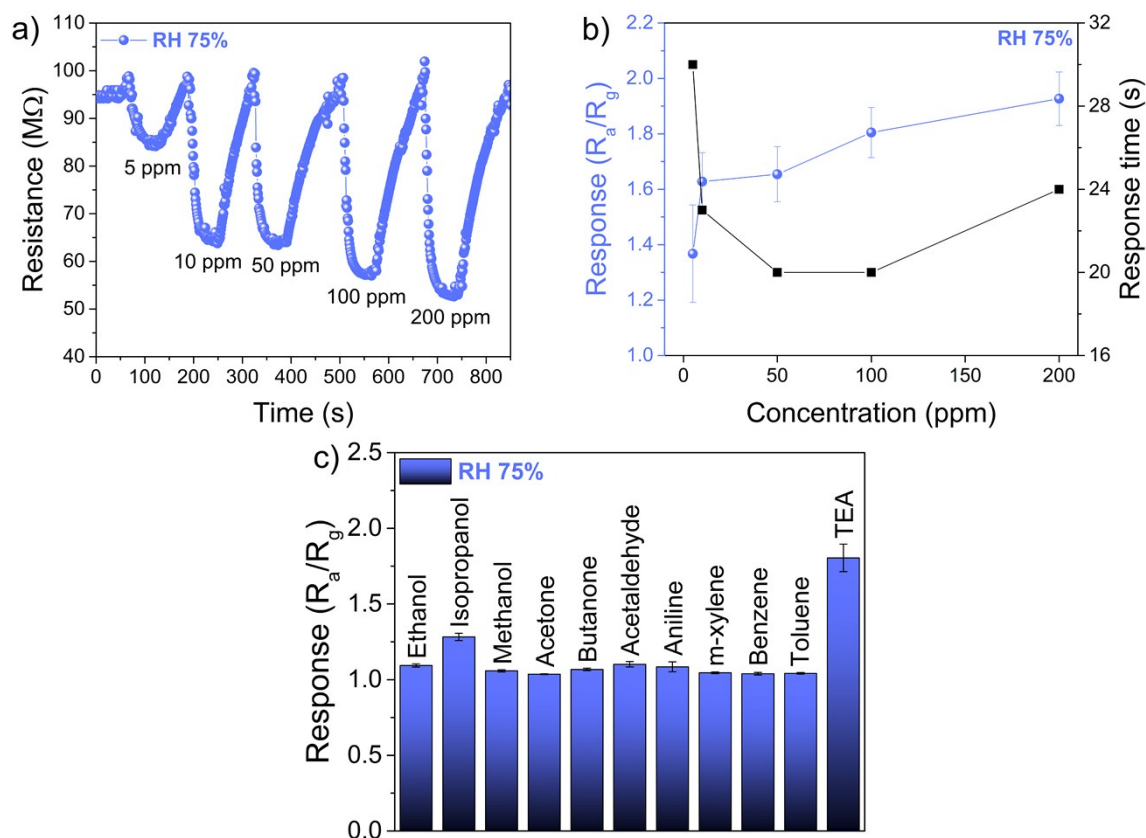

**Fig. S7** VOC-sensing performance of  $CeO_2$  NS at room temperature and 75% RH. (a) Transient response curves to the concentration range of 5–200 ppm of TEA. The sensor is more sensitive to TEA at low concentrations, however, the response is lower than that observed at 98% RH. (b) Sensing response and response time as a function of the TEA concentration. (c) VOCs-sensing selectivity of  $CeO_2$  NS to different VOCs at the concentration of 100 ppm. The error bars show the standard deviation from average.



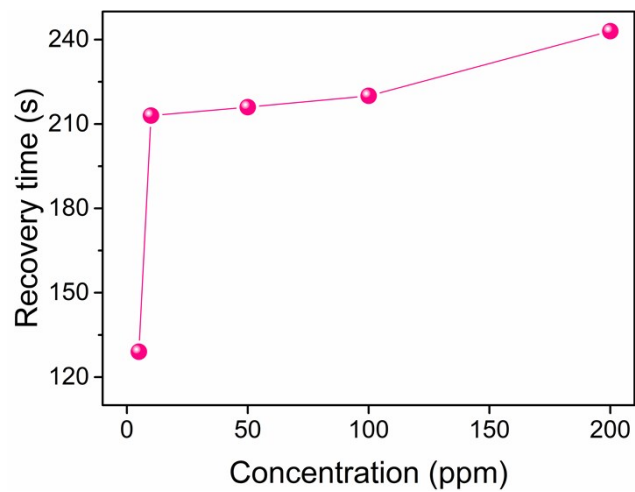

**Fig. S8** Recovery time of CeO<sub>2</sub> NS for different TEA concentrations at room temperature and 98% RH.
